# Supplementary material for: Molecular mechanism of specific HLA-A mRNA recognition by the RNA-binding-protein hMEX3B to promote tumor immune escape
Source: Springer Nature journal article supplement (doi:10.1038/s42003-024-05845-y), 2024-02-07
Supplement: MOESM2 [file 42003_2024_5845_MOESM2_ESM-1.pdf]

## **Description of Additional Supplementary Files**

**File name:** Supplementary Data 1

**Description:** The source data for the graphs in the figures (main figures 6 and 7 and supplementary figures S6 and S7).
