# Supplementary material for: Molecular mechanism of specific HLA-A mRNA recognition by the RNA-binding-protein hMEX3B to promote tumor immune escape
Source: Commun Biol. 2024 Feb 7;7:158. doi: 10.1038/s42003-024-05845-y (PMC10850505; doi:10.1038/s42003-024-05845-y)
Supplement: Supplementary file 3 — Supplementary Data 1 [file 42003_2024_5845_MOESM3_ESM.xlsx]

## Sheet: Fig.6
Fig.6a
		HLA-A mRNA (fold)
	EV	1	1	1
	WT	0.596882	0.495261	0.511579
	TR4A	0.953229	0.973934	0.890526
Fig.6c
		HLA-A mRNA (fold)
	EV	1	1	1
	sh1	2.83	3.01	2.53
	sh2	2.13	2.2	2.62
	sh3	3.15	3.23	2.79
Fig.6e
		HLA-A mRNA (fold)
	EV	1	1	1
	WT	0.561033	0.558887	0.646914
	TR4A	0.957746	0.950749	0.995062

## Sheet: supfigS6
supfigS6a
		hMEX3B mRNA (fold)
	EV	1	1	1
	WT	2120.22	1734.13	2134.97
	TR4A	1845.76	1770.57	2179.83
supfigS6b
		hMEX3B mRNA (fold)
	EV	1	1	1
	sh1	0.25349	0.167241	0.366021
	sh2	0.283221	0.397768	0.463294
	sh3	0.132127	0.170755	0.323088
supfigS6c
		hMEX3B mRNA (fold)
	EV	1	1	1
	WT	1305.15	1226.22	1606.83
	TR4A	1217.75	1184.45	1629.26

## Sheet: Fig.7
Fig.7a
		HLA-A mRNA (fold)
	EV	1	1	1
	WT	0.647982	0.636574	0.567059
	G4D	0.997758	0.979167	0.995294
	C2S	0.975336	0.990741	0.952941
	RINGless	0.984305	0.930556	0.969412
Fig.7c
		HLA-A mRNA (fold)
	EV	1	1	1
	WT	0.609626	0.52132	0.656126
	G4D	0.991979	0.995873	1.00527
	C2S	0.986631	0.988996	1.00791
	RINGless	0.963904	0.964237	0.993412

## Sheet: supfigS7
supfigS7a
		hMEX3B mRNA (fold)
	EV	1	1	1
	WT	1217.75	968.763	1031.12
	G4D	1060.11	879.171	873.098
	C2S	1112.82	891.444	942.272
	RINGless	955.426	770.686	929.3
supfigS7b
		hMEX3B mRNA (fold)
	EV	1	1	1
	WT	776.047	786.88	648.067
	G4D	734.185	689.784	515.561
	C2S	630.346	739.292	786.88
	RINGless	661.685	685.019	522.758
